# Supplementary material
Source: PubMed Central journal article supplement (PMC6707929)
Supplement: JB.00055-19-s0003.pdf [file JB.00055-19-s0003.pdf]

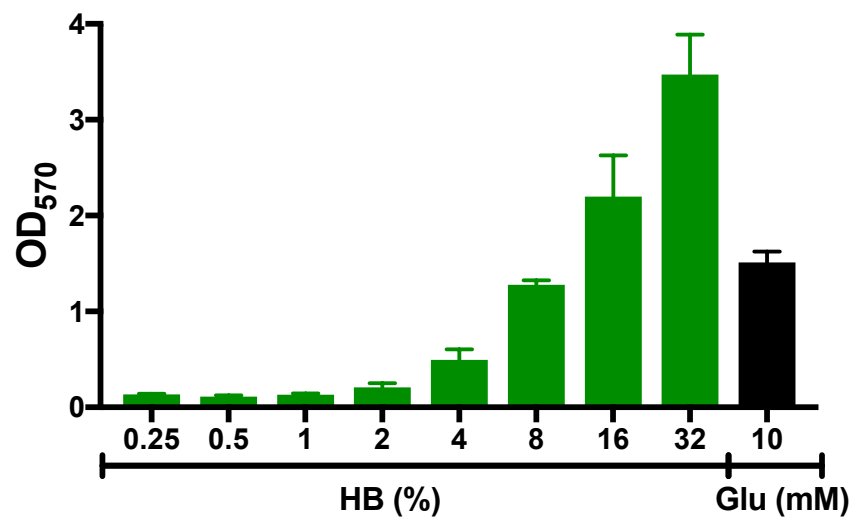

**Fig. S01.** *S. Typhimurium* biofilm formation in human bile (HB). Biofilm formation in M9 media supplemented with different amounts of human bile or glucose (10 mM) measured by crystal violet.

**Supplementary Table 3.** Differentially regulated operons in biofilms grown in *in vitro* human GS conditions by RNASeq

| Operon function   | Gene name  | Locus number | Fold Change | P value    | Function                                                               |
|-------------------|------------|--------------|-------------|------------|------------------------------------------------------------------------|
| SPI6              | STM14_0320 | STM14_0320   | 57.86       | 0          | putative cytoplasmic protein                                           |
|                   | STM14_0321 | STM14_0321   | 20.61       | 0          | putative cytoplasmic protein                                           |
| Fimbriae          | stbB       | STM14_0395   | -10.93      | 0.00010127 | Putative fimbriae chaparone;stbB;ortholog                              |
|                   | stbA       | STM14_0396   | -4.8        | 0.0502858  | Putative fimbriae major subunit;stbA;ortholog                          |
| Purine metabolism | purA       | STM14_5248   | 2.09        | 2.723E-07  | Adenylosuccinate synthetase;purA;ortholog                              |
|                   | purB       | STM14_1410   | 2.73        | 0.00166837 | Adenylosuccinate lyase;purB;ortholog                                   |
|                   | purC       | STM14_3050   | 8.23        | 0          | Phosphoribosylaminoimidazole-succinocarboxamide synthase;purC;ortholog |
|                   | purD       | STM14_5016   | 7.78        | 0          | Phosphoribosylamine--glycine ligase;purD;ortholog                      |
|                   | purE       | STM14_0624   | 16.47       | 0          | N5-carboxyaminoimidazole ribonucleotide mutase;purE;ortholog           |
|                   | purF       | STM14_2909   | 14.3        | 0          | Amidophosphoribosyltransferase;purF;ortholog                           |
|                   | purG       | STM14_3145   | 16.15       | 0          | #N/A                                                                   |
|                   | purH       | STM14_5017   | 3.65        | 0          | Bifunctional purine biosynthesis protein PurH;purH;ortholog            |
|                   | purK       | STM14_0623   | 25.24       | 0          | N5-carboxyaminoimidazole ribonucleotide synthase;purK;ortholog         |
|                   | purM       | STM14_3064   | 13.05       | 0          | Phosphoribosylformylglycinamide cyclo-ligase;purM;ortholog             |
|                   | purN       | STM14_3065   | 7.87        | 0          | Phosphoribosylglycinamide formyltransferase;purN;ortholog              |
|                   | purR       | STM14_1727   | 1.84        | 0.02341246 | HTH-type transcriptional repressor PurR;purR;ortholog                  |
|                   | purT       | STM14_2288   | 22.79       | 0          | Phosphoribosylglycinamide formyltransferase 2;purT;ortholog            |
|                   | purU       | STM14_2122   | 1.81        | 3.6244E-05 | Formyltetrahydrofolate deformylase;purU;ortholog                       |
|                   | yicE       | STM14_4513   | 14.08       | 0          | Putative NCS2 family purine/xanthine transport protein;yicE;ortholog   |
| Fimbriae          | fimA       | STM14_0635   | -10.15      | 4E-10      | Type-1 fimbrial protein, A chain;fimA;ortholog                         |
|                   | fimI       | STM14_0636   | -9.22       | 1.667E-07  | Fimbrin-like protein FimI;fimI;ortholog                                |
|                   | fimC       | STM14_0637   | -14.46      | 9.89E-08   | Chaperone protein FimC;fimC;ortholog                                   |
|                   | fimD       | STM14_0638   | -3.03       | 0.00151554 | Outer membrane usher protein FimD;fimD;ortholog                        |
|                   | fimZ       | STM14_0641   | -15.8       | 0          | Fimbriae Z protein;fimZ;ortholog                                       |
|                   | fimY       | STM14_0642   | -4.03       | 7.2768E-05 | Fimbriae Y protein;fimY;ortholog                                       |
|                   | STM14_0643 | STM14_0643   | -4.86       | 0.00043957 | #N/A                                                                   |
|                   | fimW       | STM14_0644   | -1.8        | 0.04777227 | Fimbriae W protein;fimW;ortholog                                       |
| SPI2 effector     | ssel       | STM14_1193   | -7.32       | 0          | Secreted effector protein Ssel;ssel;ortholog                           |
|                   | ssel       | STM14_1193   | -15.02      | 0          | Secreted effector protein Ssel;ssel;ortholog                           |
| SPI2 effector     | pipA       | STM14_1232   | -2.44       | 0.00193477 | Pathogenicity island encoded protein: SPI5;pipA;ortholog               |
|                   | pipB       | STM14_1233   | -37.41      | 0          | Secreted effector protein PipB;pipB;ortholog                           |
|                   | STM14_1235 | STM14_1235   | -9.76       | 0.00231626 | #N/A                                                                   |
|                   | serX       | STM14_1297   | -10.39      | 0.00070678 | tRNA-Ser                                                               |
| Curli fimbriae    | csgG       | STM14_1303   | 8.24        | 0          | Curli production assembly/transport component CsgG;csgG;ortholog       |
|                   | csgF       | STM14_1304   | 20.13       | 0          | Curli production assembly/transport component CsgF;csgF;ortholog       |
|                   | csgE       | STM14_1305   | 26.57       | 0          | Curli production assembly/transport component CsgE;csgE;ortholog       |

|                                              |            |            |           |                                                       |                                                                        |
|----------------------------------------------|------------|------------|-----------|-------------------------------------------------------|------------------------------------------------------------------------|
|                                              | csgD       | STM14_1306 | 27.14     | 0                                                     | Probable csgAB operon transcriptional regulatory protein;csgD;ortholog |
|                                              | csgB       | STM14_1309 | 76.33     | 0                                                     | Minor curlin subunit;csgB;ortholog                                     |
|                                              | csgA       | STM14_1310 | 82.93     | 0                                                     | Major curlin subunit;csgA;ortholog                                     |
|                                              | csgC       | STM14_1311 | 31.74     | 0                                                     | Curli assembly protein CsgC;csgC;ortholog                              |
|                                              | ymdA       | STM14_1312 | 11.43     | 0                                                     | Uncharacterized protein YmdA;ymdA;ortholog                             |
|                                              | rpmF       | STM14_1364 | 56.75     | 0                                                     | 50S ribosomal protein L32;rpmF;ortholog                                |
| SPI2 effector                                | sifA       | STM14_1400 | -23.66    | 0                                                     | Secreted effector protein SifA;sifA;ortholog                           |
| Arginine utilization in Nitrogen limited env | argD_1     | STM14_1582 | -9.76     | 1.2E-08                                               | #N/A                                                                   |
|                                              | astA       | STM14_1583 | -9.89     | 2.5E-09                                               | Arginine N-succinyltransferase;astA;ortholog                           |
|                                              | astD       | STM14_1584 | -5.59     | 6.532E-07                                             | N-succinylglutamate 5-semialdehyde dehydrogenase;astD;ortholog         |
|                                              | astB       | STM14_1585 | -3.24     | 7.1393E-05                                            | N-succinylarginine dihydrolase;astB;ortholog                           |
|                                              | spy        | STM14_1588 | -2.28     | 3.58E-08                                              | Periplasmic protein related to spheroblast formation;spy;ortholog      |
|                                              | osmE       | STM14_1592 | -12.77    | 0                                                     | Transcriptional activator of ntrL protein;osmE;ortholog                |
| SPI2                                         | ssrB       | STM14_1686 | -15.15    | 0                                                     | Secretion system regulator: transcriptonal activator;ssrB;ortholog     |
|                                              | ssrA       | STM14_1687 | -21.9     | 0                                                     | Histidine kinase;ssrA;ortholog                                         |
|                                              | ssaC       | STM14_1689 | -35.23    | 0                                                     | Secretion system apparatus protein;ssaC;ortholog                       |
|                                              | ssaD       | STM14_1690 | -26.6     | 0                                                     | Secretion system apparatus protein;ssaD;ortholog                       |
|                                              | ssaE       | STM14_1691 | -19.92    | 0                                                     | Secretion system effector;ssaE;ortholog                                |
|                                              | STM14_1693 | STM14_1693 | -32.8     | 0                                                     | #N/A                                                                   |
|                                              | STM14_1694 | STM14_1694 | -28.11    | 0                                                     | #N/A                                                                   |
|                                              | sscA       | STM14_1695 | -21.96    | 0                                                     | Secretion system chaparone;sscA;ortholog                               |
|                                              | sseC       | STM14_1696 | -24.49    | 0                                                     | Secreted effector protein SseC;sseC;ortholog                           |
|                                              | sseD       | STM14_1697 | -22.19    | 0                                                     | Secreted effector protein SseD;sseD;ortholog                           |
|                                              | sseE       | STM14_1698 | -26.24    | 0                                                     | Secretion system effector;sseE;ortholog                                |
|                                              | sscB       | STM14_1699 | -21.2     | 0                                                     | Secretion system chaparone;sscB;ortholog                               |
|                                              | sseF       | STM14_1700 | -9.63     | 0                                                     | Secretion system effector;sseF;ortholog                                |
|                                              | sseG       | STM14_1701 | -3.41     | 3.07E-08                                              | Secretion system effector;sseG;ortholog                                |
|                                              | ssaG       | STM14_1702 | -22.16    | 0                                                     | Secretion system apparatus;ssaG;ortholog                               |
|                                              | ssaG       | STM14_1702 | -25.24    | 0                                                     | Secretion system apparatus;ssaG;ortholog                               |
|                                              | ssaI       | STM14_1704 | -27.82    | 0                                                     | Secretion system apparatus;ssaI;ortholog                               |
|                                              | ssaJ       | STM14_1705 | -29.28    | 0                                                     | Secretion system apparatus lipoprotein SsaJ;ssaJ;ortholog              |
|                                              | STM14_1706 | STM14_1706 | -23.52    | 0                                                     | #N/A                                                                   |
|                                              | ssaK       | STM14_1707 | -28.58    | 0                                                     | Secretion system apparatus protein SsaK;ssaK;ortholog                  |
|                                              | ssaL       | STM14_1708 | -20.35    | 0                                                     | Secretion system apparatus protein SsaL;ssaL;ortholog                  |
|                                              | ssaM       | STM14_1709 | -17.63    | 0                                                     | Secretion system apparatus protein SsaM;ssaM;ortholog                  |
|                                              | ssaV       | STM14_1710 | -20.53    | 0                                                     | Secretion system apparatus protein SsaV;ssaV;ortholog                  |
|                                              | ssaN       | STM14_1711 | -11.75    | 0                                                     | Probable secretion system apparatus ATP synthase SsaN;ssaN;ortholog    |
| ssaO                                         | STM14_1712 | -6.87      | 1.282E-07 | Secretion system apparatus protein SsaO;ssaO;ortholog |                                                                        |
| ssaP                                         | STM14_1713 | -6.69      | 0         | Secretion system apparatus protein SsaP;ssaP;ortholog |                                                                        |

|                                      |            |            |        |            |                                                                                   |
|--------------------------------------|------------|------------|--------|------------|-----------------------------------------------------------------------------------|
|                                      | ssaQ       | STM14_1714 | -2.81  | 0.00013326 | Secretion system apparatus protein SsaQ;ssaQ;ortholog                             |
|                                      | ssaR       | STM14_1715 | -32.78 | 0          | #N/A                                                                              |
|                                      | ssaS       | STM14_1716 | -31.12 | 0          | Secretion system apparatus protein SsaS;ssaS;ortholog                             |
|                                      | ssaT       | STM14_1717 | -29.77 | 0          | Secretion system apparatus protein SsaT;ssaT;ortholog                             |
|                                      | ssaU       | STM14_1718 | -11.57 | 0          | Secretion system apparatus protein SsaU;ssaU;ortholog                             |
|                                      | valV       | STM14_1721 | 10.54  | 6.1801E-06 | #N/A                                                                              |
|                                      | STM14_1804 | STM14_1804 | -10.89 | 0          | #N/A                                                                              |
|                                      | STM14_1805 | STM14_1805 | -12.07 | 0          | #N/A                                                                              |
|                                      | STM14_1937 | STM14_1937 | -12.34 | 0          | #N/A                                                                              |
| SPI2 effector                        | sifB       | STM14_1940 | -20.99 | 0          | Secreted effector protein SifB;sifB;ortholog                                      |
|                                      | yncJ       | STM14_1941 | -10.69 | 0          | Putative periplasmic protein;yncJ;ortholog                                        |
|                                      | STM14_1971 | STM14_1971 | -25.25 | 0          | #N/A                                                                              |
| SPI2 effector                        | sseJ       | STM14_1974 | -27.72 | 0          | Secreted effector protein SseJ;sseJ;ortholog                                      |
| propanediol utilization (pdu) operon | pduM       | STM14_2537 | 51.58  | 0          | Propanediol utilization protein;pduM;ortholog                                     |
|                                      | pduP       | STM14_2540 | 8.14   | 0          | Propanediol utilization CoA-dependent propionaldehyde dehydrogenase;pduP;ortholog |
|                                      | pduS       | STM14_2542 | 7.65   | 2E-10      | Propanediol utilization protein;pduS;ortholog                                     |
|                                      | STM14_2637 | STM14_2637 | -20.79 | 0          | putative ABC transporter periplasmic component                                    |
|                                      | STM14_2638 | STM14_2638 | -16.49 | 0          | putative inner membrane protein                                                   |
|                                      | STM14_2756 | STM14_2756 | -5.63  | 1.094E-05  | #N/A                                                                              |
|                                      | STM14_2759 | STM14_2759 | -32.27 | 0          | #N/A                                                                              |
|                                      | STM14_2760 | STM14_2760 | -29.99 | 0          | #N/A                                                                              |
|                                      | STM14_2761 | STM14_2761 | -32.74 | 0          | #N/A                                                                              |
|                                      | STM14_2762 | STM14_2762 | -39.8  | 0          | #N/A                                                                              |
|                                      | STM14_2763 | STM14_2763 | -30.43 | 0          | #N/A                                                                              |
| SPI2 effector                        | sseL       | STM14_2824 | -33.69 | 0          | Deubiquitinase SseL;sseL;ortholog                                                 |
| Thiamine synthesis                   | purF       | STM14_2909 | 14.3   | 0          | Amidophosphoribosyltransferase;purF;ortholog                                      |
| Colicin V production                 | cvpA       | STM14_2910 | 12.97  | 0          | Membrane protein required for colicin V production;cvpA;ortholog                  |
| Phage                                | STM14_3166 | STM14_3166 | -10.74 | 3.6E-09    | DNA polymerase V subunit                                                          |
|                                      | STM14_3168 | STM14_3168 | -6.02  | 0.00079487 | phage tail assembly-like protein                                                  |
|                                      | STM14_3169 | STM14_3169 | -2.77  | 0.05396389 | phage tail assembly-like protein                                                  |
|                                      | STM14_3170 | STM14_3170 | -1.71  | 0.0323214  | tail fiber-like protein                                                           |
|                                      | STM14_3171 | STM14_3171 | -10.78 | 0.02949509 | hypothetical protein                                                              |
|                                      | STM14_3172 | STM14_3172 | -3.8   | 0.00217499 | host specificity protein-J-like protein                                           |
|                                      | STM14_3192 | STM14_3192 | -31.83 | 0.00113684 | DNA packaging-like protein                                                        |
|                                      | STM14_3331 | STM14_3331 | -8.9   | 0.00817208 | #N/A                                                                              |
|                                      | STM14_3336 | STM14_3336 | 1.63   | 0.03114065 | #N/A                                                                              |
|                                      | iroN       | STM14_3348 | -19.64 | 5.1E-09    | TonB-dependent siderophore receptor protein;iroN;ortholog                         |
| SPI2 effector                        | pipB2      | STM14_3350 | -35.71 | 0          | Secreted effector protein pipB2;pipB2;ortholog                                    |
| Virulence protein                    | virK       | STM14_3352 | -4.74  | 0          | VirK-like protein;virK;ortholog                                                   |
| tricarboxylic transport              | STM14_3361 | STM14_3361 | 13.82  | 7.88E-08   | tricarboxylic transport                                                           |
|                                      | STM14_3362 | STM14_3362 | 8.72   | 0.00019185 | tricarboxylic transport                                                           |

|                                   |            |            |        |            |                                                                                  |
|-----------------------------------|------------|------------|--------|------------|----------------------------------------------------------------------------------|
|                                   | STM14_3363 | STM14_3363 | 12.05  | 4.799E-07  | tricarboxylic transport                                                          |
|                                   | STM14_3365 | STM14_3365 | -30.32 | 0          | hypothetical protein                                                             |
|                                   | ygaF       | STM14_3366 | -24.91 | 0          | L-2-hydroxyglutarate oxidase LhgO;ygaF;ortholog                                  |
|                                   | gabD       | STM14_3367 | -15.76 | 0          | NADP-dependent succinate-semialdehyde dehydrogenase I;gabD;ortholog              |
|                                   | gabT       | STM14_3368 | -12.21 | 3.3E-09    | 4-aminobutyrate aminotransferase;gabT;ortholog                                   |
| Hydrogenase                       | hypF       | STM14_3434 | -2.04  | 0.0049248  | Hydrogenase maturation protein;hypF;ortholog                                     |
|                                   | hydN       | STM14_3436 | -28.56 | 0          | Electron transport protein (FeS center) from formate to hydrogen;hydN;ortholog   |
|                                   | STM14_3438 | STM14_3438 | -28.12 | 0          | #N/A                                                                             |
|                                   | hycl       | STM14_3439 | -31.77 | 0          | Protease involved in processing C-terminal end of HycE;hycl;ortholog             |
|                                   | hycH       | STM14_3440 | -27.25 | 0          | Protein for processing of HycE;hycH;ortholog                                     |
|                                   | hycG       | STM14_3441 | -33.57 | 0          | Hydrogenase activity;hycG;ortholog                                               |
|                                   | hycF       | STM14_3442 | -2.33  | 0.005573   | Hydrogenase 3;hycF;ortholog                                                      |
|                                   | hycE       | STM14_3443 | -36.23 | 0          | Hydrogenase 3, large subunit;hycE;ortholog                                       |
|                                   | hycD       | STM14_3444 | -30.15 | 0          | Hydrogenase 3, membrane subunit;hycD;ortholog                                    |
|                                   | hycC       | STM14_3445 | -22.18 | 0          | Hydrogenase 3, membrane subunit;hycC;ortholog                                    |
|                                   | hycB       | STM14_3446 | -36.07 | 0          | Hydrogenase-3, iron-sulfur subunit;hycB;ortholog                                 |
|                                   | hycA       | STM14_3448 | -24.88 | 0          | Transcriptional repressor of hyc and hyp operons;hycA;ortholog                   |
|                                   | hypB       | STM14_3451 | -6.57  | 0          | Hydrogenase-3 accessory protein;hypB;ortholog                                    |
|                                   | hypC       | STM14_3452 | -4.22  | 2.334E-06  | Putative hydrogenase expression/formation protein;hypC;ortholog                  |
|                                   | hypD       | STM14_3453 | -4.52  | 1.41E-08   | Putative hydrogenase expression/formation protein;hypD;ortholog                  |
|                                   | hypE       | STM14_3454 | -6.16  | 9E-10      | Putative hydrogenase expression/formation protein;hypE;ortholog                  |
|                                   | fhlA       | STM14_3455 | -3.12  | 1.6341E-05 | Formate hydrogenlyase transcriptional activator;fhlA;ortholog                    |
|                                   | ygbA       | STM14_3456 | -4.19  | 2.458E-07  | Putative cytoplasmic protein;ygbA;ortholog                                       |
| Iron transport                    | sitA       | STM14_3458 | -7.2   | 0          | Fur regulated Salmonella iron transporter;sitA;ortholog                          |
|                                   | sitB       | STM14_3459 | -5.1   | 0          | Fur regulated Salmonella iron transporter;sitB;ortholog                          |
|                                   | sitC       | STM14_3460 | -5.99  | 0          | Fur regulated Salmonella iron transporter;sitC;ortholog                          |
|                                   | sitD       | STM14_3461 | -9.92  | 0          | Fur regulated Salmonella iron transporter;sitD;ortholog                          |
|                                   | STM14_3787 | STM14_3787 | -7.68  | 0          | #N/A                                                                             |
|                                   | STM14_3787 | STM14_3787 | -14.47 | 0          | #N/A                                                                             |
|                                   | STM14_3787 | STM14_3787 | -17.11 | 0          | #N/A                                                                             |
| putative cation/proton antiporter | yjcO       | STM14_5153 | -10.25 | 0          | Putative TPR repeat protein;yjcO;ortholog                                        |
|                                   | nrdG       | STM14_5342 | 14.72  | 0          | Anaerobic ribonucleoside-triphosphate reductase-activating protein;nrdG;ortholog |
|                                   | treC       | STM14_5345 | -8.44  | 1.3E-09    | Trehalose-6-P hydrolase;treC;ortholog                                            |
|                                   | treB       | STM14_5346 | -12.47 | 0          | #N/A                                                                             |

**Supplementary Table 4.** Strains and plasmids used in this study.

| Strains  | Genotype or relevant phenotype                                      | Reference or source |
|----------|---------------------------------------------------------------------|---------------------|
| JSG210   | <i>Salmonella enterica</i> sv. Typhimurium ATCC 14028               | ATCC                |
| JSG3736  | <i>S. Typhimurium</i> $\Delta$ <i>csgA</i>                          | (1)                 |
| JSG1149  | <i>S. Typhimurium</i> pFPV25.1                                      | This study          |
| JSG4136  | <i>S. Typhimurium</i> $\Delta$ <i>csgA</i> pFPV25.1                 | This study          |
| JSG4237  | <i>S. Typhimurium</i> WT (JSG210) + pCS26                           | This study          |
| JSG4238  | <i>S. Typhimurium</i> WT (JSG210) + pBA                             | This study          |
| JSG4239  | <i>S. Typhimurium</i> WT (JSG210) + pDEFG                           | This study          |
| JSG4277  | <i>S. Typhimurium</i> $\Delta$ <i>csgD</i>                          | This study          |
| JSG4292  | <i>S. Typhimurium</i> $\Delta$ <i>csgD</i> (JSG4277) + pCS26        | This study          |
| JSG4293  | <i>S. Typhimurium</i> $\Delta$ <i>csgD</i> (JSG4277) + pBA          | This study          |
| JSG4294  | <i>S. Typhimurium</i> $\Delta$ <i>csgD</i> (JSG4277) + pDEFG        | This study          |
| JSG1811  | <i>S. Typhimurium</i> $\Delta$ <i>rpos</i>                          | (2)                 |
| JSG4272  | <i>S. Typhimurium</i> $\Delta$ <i>rpos</i> (JSG1811) + pCS26        | This study          |
| JSG4273  | <i>S. Typhimurium</i> $\Delta$ <i>rpos</i> (JSG1811) + pBA          | This study          |
| JSG4274  | <i>S. Typhimurium</i> $\Delta$ <i>rpos</i> (JSG1811) + pDEFG        | This study          |
| JSG4302  | <i>S. Typhimurium</i> <i>ompR</i> ::Cam                             | (3)                 |
| JSG4303  | <i>S. Typhimurium</i> <i>ompR</i> ::Cam (JSG4302) + pCS26           | This study          |
| JSG4304  | <i>S. Typhimurium</i> <i>ompR</i> ::Cam (JSG4302) + pBA             | This study          |
| JSG4305  | <i>S. Typhimurium</i> <i>ompR</i> ::Cam (JSG4302) + pDEFG           | This study          |
| JSG4355  | <i>S. Typhimurium</i> <i>cpxR</i> ::Cam                             | (6)                 |
| JSG4356  | <i>S. Typhimurium</i> <i>hns</i> ::Cam                              | (2)                 |
| JSG4360  | <i>S. Typhimurium</i> <i>cpxR</i> ::Cam mutant (JSG4355) + pCS26    | This study          |
| JSG4361  | <i>S. Typhimurium</i> <i>cpxR</i> ::Cam mutant (JSG4355) + pBA      | This study          |
| JSG4362  | <i>S. Typhimurium</i> <i>cpxR</i> ::Cam mutant (JSG4355) + pDEFG    | This study          |
| JSG4363  | <i>S. Typhimurium</i> <i>hns</i> ::Cam mutant (JSG4356) + pCS26     | This study          |
| JSG4364  | <i>S. Typhimurium</i> <i>hns</i> ::Cam mutant (JSG4356) + pBA       | This study          |
| JSG4365  | <i>S. Typhimurium</i> <i>hns</i> ::Cam mutant (JSG4356) + pDEFG     | This study          |
| Plasmid  | Characteristics                                                     | Source              |
| pFPV25.1 | GFP tagging; pfpv25 p <sub>rpsM</sub> -gfpmut3                      | (4)                 |
| pCS26    | Empty pCS26 plasmid with <i>luxCDABE</i> and Km resistance cassette | (5)                 |
| pBA      | pCS26 with curli <i>csgBA</i> operon promoter                       | (5)                 |
| pDEFG    | pCS26 with Curli <i>csgDEFG</i> operon promoter                     | (5)                 |

1. Adcox HE, Vasicek EM, Dwivedi V, Hoang K V, Turner J, Gunn JS. 2016. *Salmonella* extracellular matrix components influence biofilm formation and gallbladder colonization. *Infect Immun* 84:3243–3251.
2. Prouty AM, Brodsky IE, Manos J, Belas R, Falkow S, Gunn JS. 2004. Transcriptional regulation of *Salmonella enterica* serovar Typhimurium genes by bile. *FEMS Immunol Med Microbiol* 41:177–185.
3. Porwollik S, Santiviago CA, Cheng P, Long F, Desai P, Fredlund J, Srikumar S, Silva CA, Chu W, Chen X, Canals R, Reynolds MM, Bogomolnaya L, Shields C, Cui P, Guo J,

- Zheng Y, Endicott-Yazdani T, Yang H-J, Maple A, Ragoza Y, Blondel CJ, Valenzuela C, Andrews-Polymenis H, McClelland M. 2014. Defined Single-Gene and Multi-Gene Deletion Mutant Collections in *Salmonella enterica* sv Typhimurium. PLoS One 9:e99820.
4. Valdivia RH, Falkow S. 1996. Bacterial genetics by flow cytometry: rapid isolation of *Salmonella typhimurium* acid-inducible promoters by differential fluorescence induction. Mol Microbiol 22:367–378.
  5. White AP, Gibson DL, Kim W, Kay WW, Surette MG. 2006. Thin aggregative fimbriae and cellulose enhance long-term survival and persistence of *Salmonella*. J Bacteriol 188:3219–3227.

**Supplementary table 5.** Oligonucleotide primers used in this study

| <b>Primer</b> | <b>Sequence</b>                                                    | <b>Purpose</b>      |
|---------------|--------------------------------------------------------------------|---------------------|
| JG2674        | 5'-CCAATATTACCCAGTACGGTACGCAGAAAACAGC-3'                           | Forward <i>csgA</i> |
| JG2675        | 5'-GGTTCGTTTAATGTGACCTGAGGGATCACCG-3'                              | Reverse <i>csgA</i> |
| JG2676        | 5'-GCTTGTTTTTCGCCAGCATGAATTACTCTGC-3'                              | Forward <i>wcaM</i> |
| JG2677        | 5'-CGTGGTATCTACCGTGCATAGCGGTATTCC-3'                               | Reverse <i>wcaM</i> |
| JG2682        | 5'-GGCAGCATTACGCCCCGTCGTCAATACGGG-3'                               | Forward <i>bscE</i> |
| JG2683        | 5'-CGGCGCAGAGTTCCGGCTGGTTTTACATAACG-3'                             | Reverse <i>bscE</i> |
| JG3010        | 5'-TGTGTCACGTCTTGTGCGTA-3'                                         | Forward pBA         |
| JG3011        | 5'-TCGGGAAAGATTTCAACCTG-3'                                         | Reverse pBA         |
| JG3012        | 5'-CAGCTGTCAGATGTGCGATT-3'                                         | Forward pDEFG       |
| JG3013        | 5'-TCATCCATGATATGGCGAGA-3'                                         | Reverse pDEFG       |
| JG2993        | 5'-ATGGGCTATTTCAACCCACA-3'                                         | Forward Kn          |
| JG2994        | 5'-GTCGCTGAATGCACGATAGA-3'                                         | Reverse Kn          |
| JG2658        | 5'-TCGACATTGCAGGCAGTAAG-3'                                         | Forward RpoS        |
| JG2659        | 5'-ACTTCGCCGGTAAAAGGAGT-3'                                         | Reverse Rpos        |
| JG2991        | 5'-gtgcgattaaaaaagtggagttcatcATGTTTAATGAAGTGTAGGCTGGAGCTGCTTC-3'   | Forward <i>csgD</i> |
| JG2992        | 5'-aatccaggtcagatagcgtttcatggccTTACCGCCTGAGCATATGAATATCCTCCTTAG-3' | Reverse <i>csgD</i> |
